# Supplementary material for: UCP2 Deficiency Increases Colon Tumorigenesis by Promoting Lipid Synthesis and Depleting NADPH for Antioxidant Defenses
Source: PubMed Central journal article supplement — Cell Rep. 2019 Aug 27;28(9):2306–2316.e5. doi: 10.1016/j.celrep.2019.07.097 (PMC6718829; doi:10.1016/j.celrep.2019.07.097), 2019-08-27
Supplement: mmc1.pdf [file mmc1.pdf]

Cell Reports, Volume 28

## Supplemental Information

### **UCP2 Deficiency Increases Colon Tumorigenesis by Promoting Lipid Synthesis and Depleting NADPH for Antioxidant Defenses**

**Esther Aguilar, Pauline Esteves, Tiphaine Sancerni, Véronique Lenoir, Thomas Aparicio, Frédéric Bouillaud, Renaud Dentin, Carina Prip-Buus, Daniel Ricquier, Claire Pecqueur, Sandra Guilmeau, and Marie-Clotilde Alves-Guerra**

# Figure S1

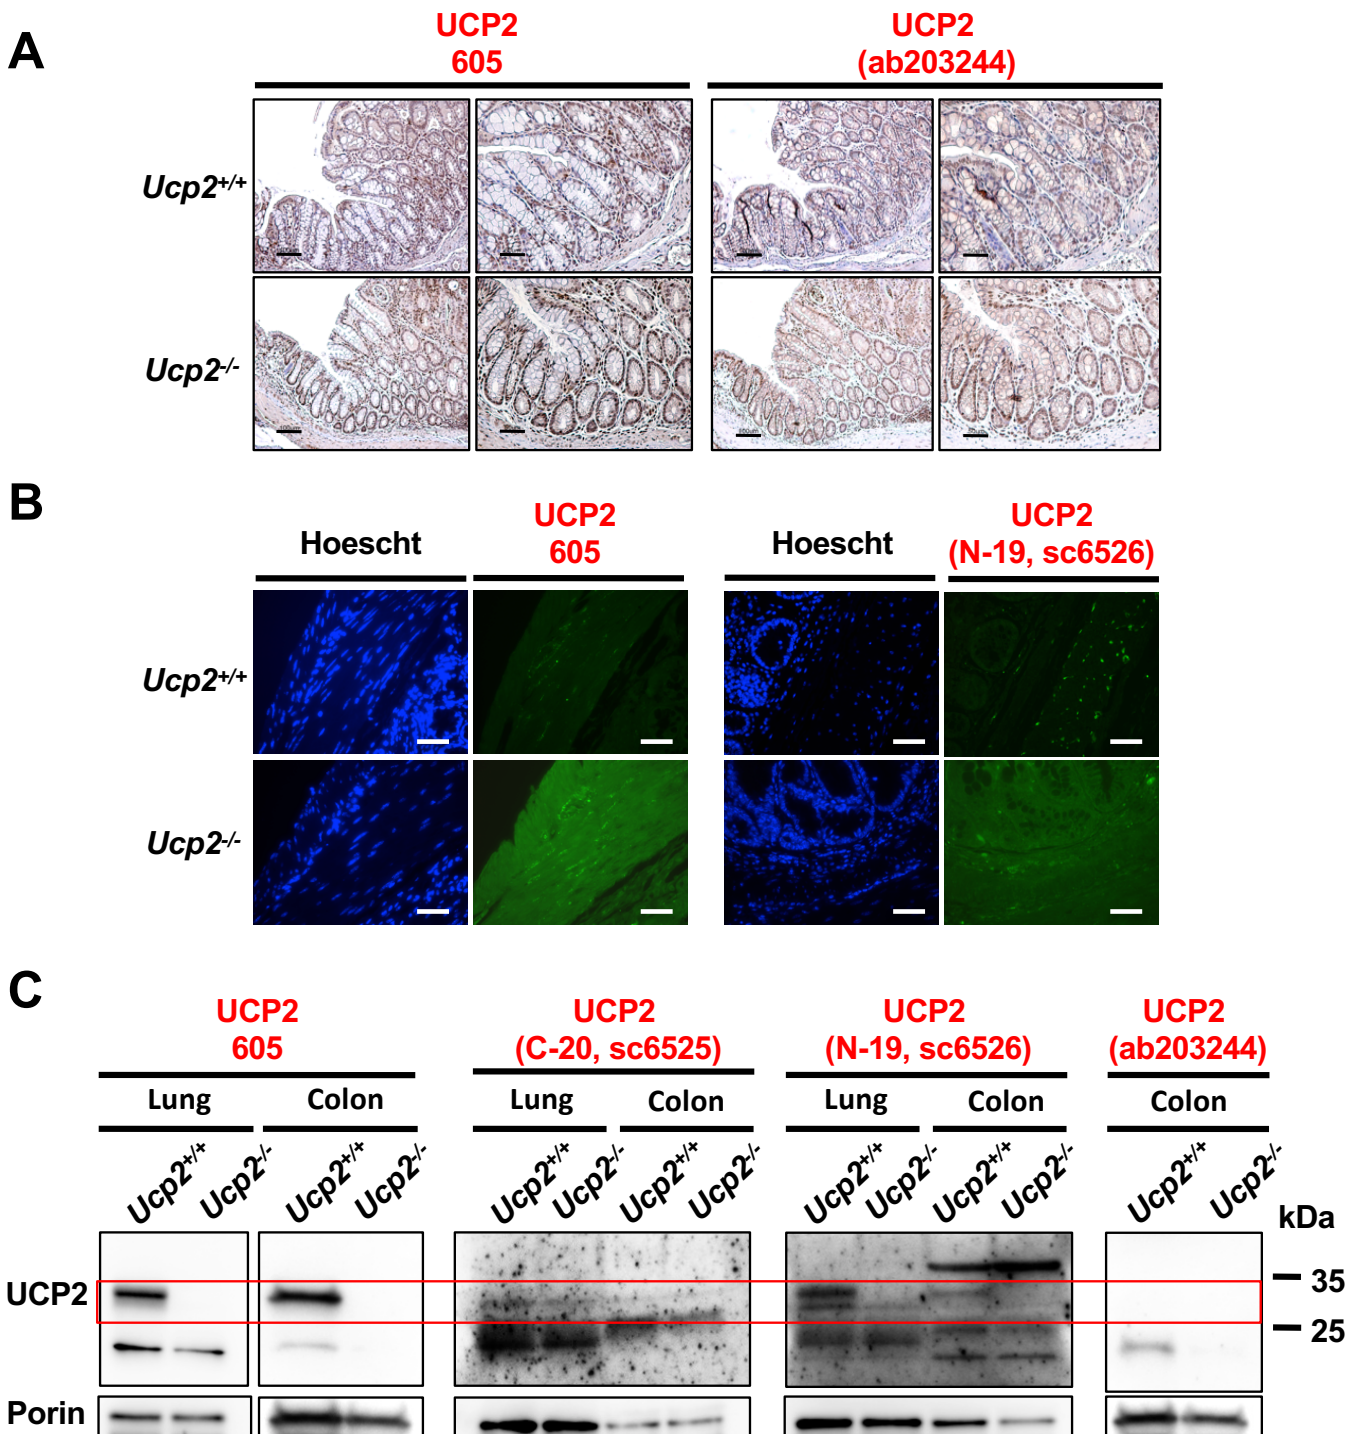

**Figure S1, related to Figure 1. UCP2 detection by immunohistochemistry, immunofluorescence and western blot analysis.**

(A) UCP2 detection by immunohistochemistry analysis using colon tissue from *Ucp2*<sup>+/+</sup> and *Ucp2*<sup>-/-</sup> AOM/DSS-treated mice. Our homemade UCP2-605 antibody and the commercial UCP2 antibody ab203244 were tested. For each antibody: low magnification (left), scale bar 100  $\mu$ m, and high magnification (right), scale bar 50  $\mu$ m.

(B) UCP2 detection by immunofluorescence (green) using colon samples. Our homemade UCP2-605 antibody and the commercial UCP2 antibody sc6526 were tested. Nuclei were stained with Hoechst 3342 (blue). Scale bar = 100  $\mu$ m.

(C) Western blot analysis of UCP2 protein levels using mitochondria protein lysates from colon and lung samples from *Ucp2*<sup>+/+</sup> and *Ucp2*<sup>-/-</sup> mice. Our homemade UCP2-605 antibody and the commercial UCP2 antibodies sc6525, sc6526 and ab203244 were used. Porin was used as a loading control.

# Figure S2

**A**

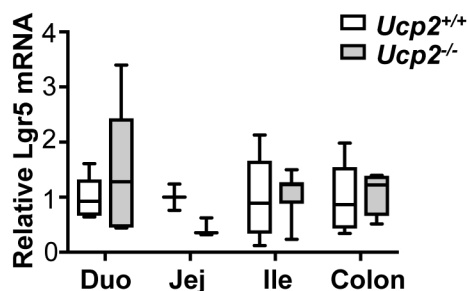

**B**

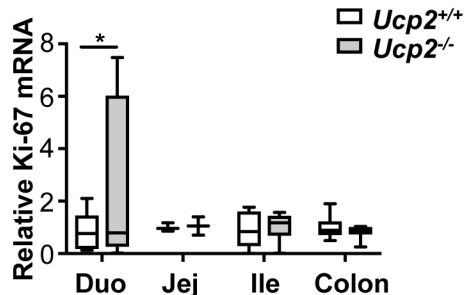

**C**

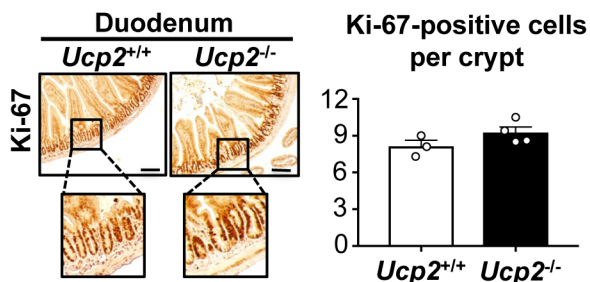

**D**

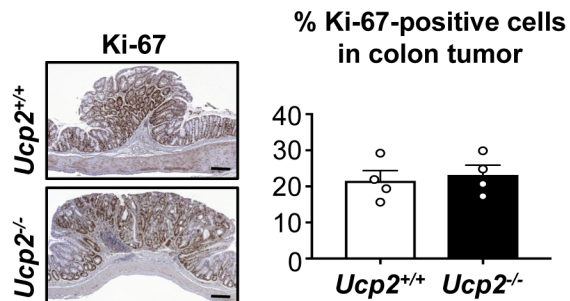

**E**

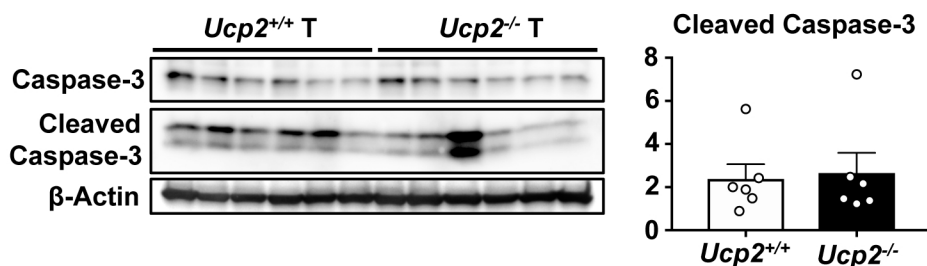

**Figure S2 , related to Figure 2. UCP2 invalidation does not affect the rate of cell proliferation and cell death.**

(A) *Lgr5* mRNA levels relative to *Ucp2*<sup>+/+</sup> samples. Data represent mean ± SEM for duodenum (Duo, n = 6), jejunum (n = 3), ileum (Ile, n = 7) and colon (n = 7).

(B) *Ki-67* mRNA levels relative to *Ucp2*<sup>+/+</sup> samples. Data represent mean ± SEM for duodenum (Duo, n = 7), jejunum (n = 3), ileum (Ile, n = 7) and colon (n = 7).

(C) Representative duodenum sections stained with *Ki-67*. Data represent mean ± SEM (n = 3-4). Scale bar = 100 μm.

(D) Representative colonic sections, showing tumoral and non-tumoral regions, stained with *Ki-67*. Data represent mean ± SEM (n = 4). Scale bar = 200 μm.

(E) Immunoblot of caspase-3 and its cleaved form. Data represent mean ± SEM (n = 6).

# Figure S3

## A

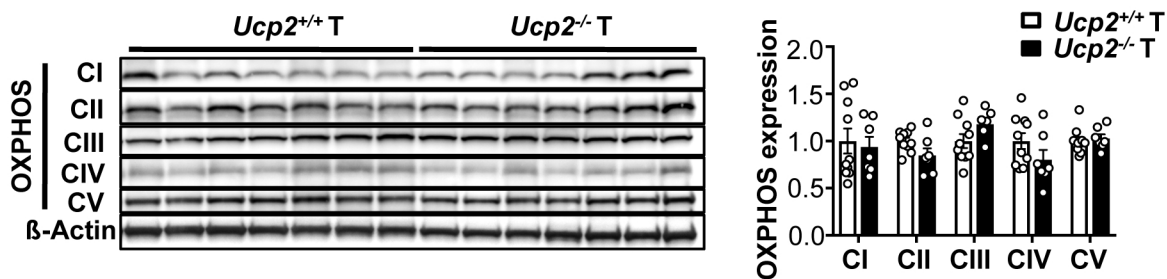

## B

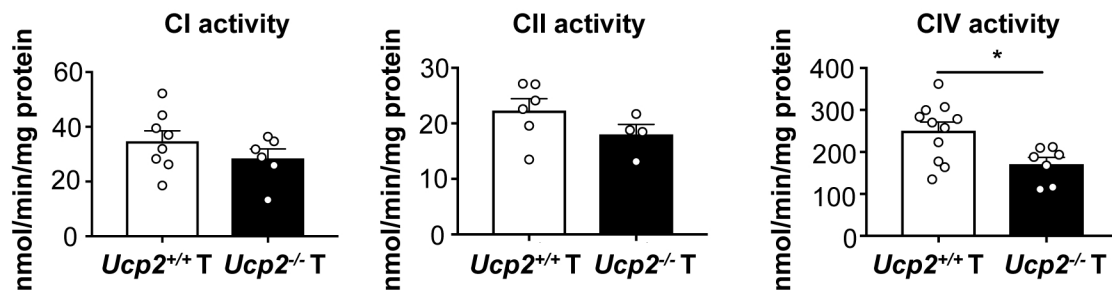

## C

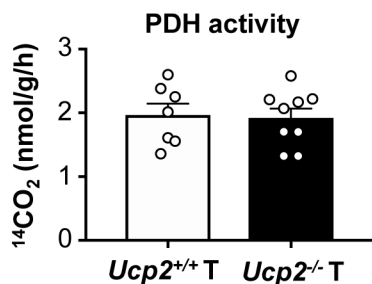

**Figure S3, related to Figure 5. Complex IV activity is reduced in *Ucp2*<sup>-/-</sup> tumors.**

(A) Representative immunoblot analysis of OXPHOS complexes (CI to CV) using whole cell extracts (*Ucp2*<sup>+/+</sup>T n = 10, *Ucp2*<sup>-/-</sup>T n = 7). Data indicate mean  $\pm$  SEM.

(B) Enzyme activities of OXPHOS complexes CI, CII and CIV normalized to protein content. Data indicate mean  $\pm$  SEM.

(C) PDH activity measured as <sup>14</sup>CO<sub>2</sub> release from [1-<sup>14</sup>C]-pyruvate (*Ucp2*<sup>+/+</sup>T n = 7, *Ucp2*<sup>-/-</sup>T n = 9). Data indicate mean  $\pm$  SEM.

# Figure S4

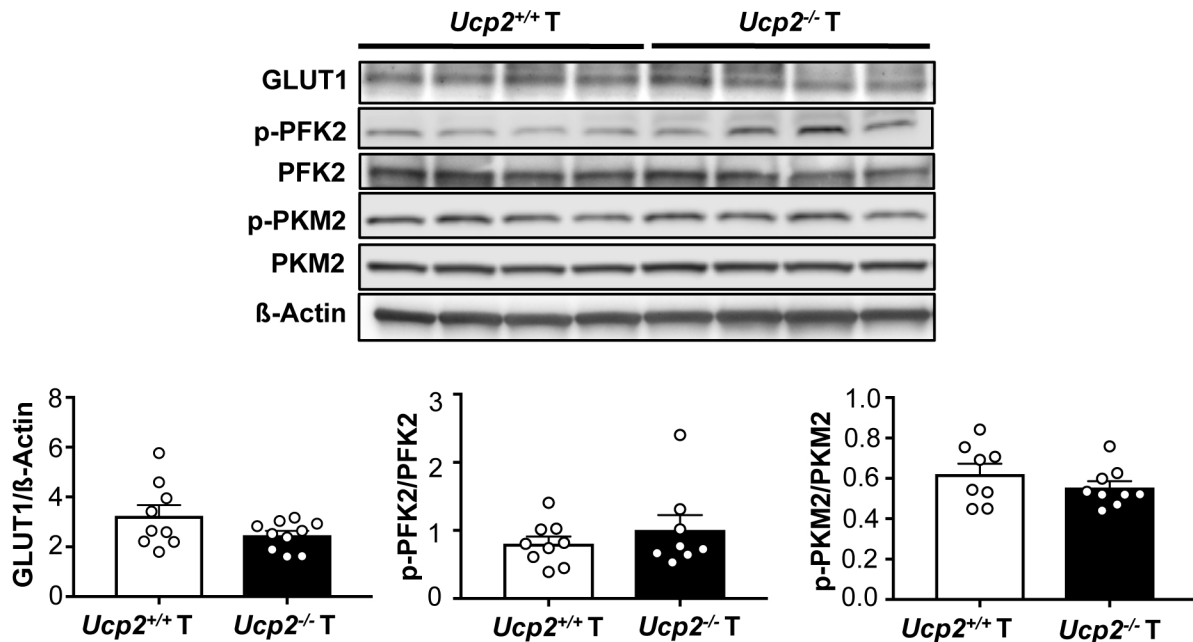

**Figure S4, related to Figure 5. Effect of UCP2 invalidation on the expression of enzymes from glycolysis.** Representative immunoblot of GLUT1, p-PFK2, PFK, p-PKM2 and PKM2 using whole cell extracts from tumors (T) with  $\beta$ -Actin as a loading control for quantification. Data indicate mean  $\pm$  SEM (n = 7-10).

**Table S1, related to Figure 1.** UCP2 expression in multiple microarray colorectal cancer data sets available from Oncomine (<http://www.oncomine.com>).

| <b>Data set</b>        | <b>Normal type</b> | <b>Colorectal cancer subtype</b> | <b>Samples (N)</b> | <b>p value</b> | <b>Changes</b> |
|------------------------|--------------------|----------------------------------|--------------------|----------------|----------------|
| <b>GAEDKE</b>          | Rectum             | Rectal adenocarcinoma            | 65 vs. 65          | 0.0817         | =              |
| <b>GASPAR</b>          | Intestinal mucosa  | Colorectal adenoma               | 22 vs. 47          | 0.0012         | ↑              |
| <b>GRAUDENS</b>        | Colon              | Colorectal carcinoma             | 12 vs. 18          | 0.3038         | =              |
| <b>HONG</b>            | Colon              | Colorectal carcinoma             | 12 vs. 70          | 0.0662         | =              |
| <b>KAISER</b>          | Colon              | Colon adenocarcinoma             | 5 vs. 41           | 0.1171         | =              |
|                        | Colon              | Colon mucinous adenocarcinoma    | 5 vs. 13           | 0.2508         | =              |
|                        | Colon              | Rectal adenocarcinoma            | 5 vs. 8            | 0.3692         | =              |
|                        | Colon              | Rectal mucinous adenocarcinoma   | 5 vs. 4            | 0.7165         | =              |
|                        | Colon              | Rectosigmoid adenocarcinoma      | 5 vs. 10           | 0.0010         | ↑              |
| <b>KI</b>              | Colorectal mucosa  | Colorectal                       | 28 vs. 53          | 0.6584         | =              |
| <b>SABATES-BELLVER</b> | Colon mucosa       | Colorectal adenoma               | 32 vs. 32          | 0.0007         | ↑              |
|                        | Colon mucosa       | Rectal adenoma                   | 32 vs. 7           | 0.1769         | =              |
| <b>SKRZPCZAK</b>       | Colon              | Colorectal adenocarcinoma        | 24 vs. 45          | 0.0112         | ↑              |
|                        | Colon              | Colorectal carcinoma             | 24 vs. 36          | 0.7489         | =              |
| <b>SKRZPCZAK 2</b>     | Colon              | Colon adenoma                    | 10 vs. 5           | 0.0011         | ↑              |
|                        | Colon              | Colon carcinoma                  | 10 vs. 5           | 0.7276         | =              |
| <b>TCGA</b>            | Colon              | Colon adenocarcinoma             | 19 vs. 102         | 0.0023         | ↓              |
|                        | Colon              | Colon mucinous adenocarcinoma    | 19 vs. 20          | 0.4327         | =              |
|                        | Colon              | Rectal adenocarcinoma            | 19 vs. 60          | 0.0010         | ↓              |
|                        | Colon              | Rectal mucinous adenocarcinoma   | 19 vs. 6           | 0.0565         | =              |
| <b>ZOU</b>             | Colon              | Colon carcinoma                  | 8 vs. 9            | 0.3845         | =              |

**Table S3, related to STAR Methods.** Sequences of primers used in this study.

| <b>Gene</b>       |                    | <b>Sequence (5'-3')</b>                              |
|-------------------|--------------------|------------------------------------------------------|
| mouse Ki-67       | forward<br>reverse | AGGATGGAAGCAAGCCAACA<br>GGCCCTTGGCATAACAAAA          |
| mouse Lgr5        | forward<br>reverse | CGAGCCTTACAGAGCCTGATACC<br>TTGCCGTCGTCTTTATTCCATTGG  |
| mouse UCP2        | forward<br>reverse | TCGAAGCCTACAAGACCATTGCAC<br>ACCAGCTCAGCACAGTTGACAATG |
| human UCP2        | forward<br>reverse | CTACAGCCAGCGCCCAGTA<br>TCAGTACGCACCATGGTCAGA         |
| mouse cyclophilin | forward<br>reverse | ATGGCACTGGCGGCAGGTCC<br>TTGCCATTCTGGACCCAAA          |
| human cyclophilin | forward<br>reverse | GTCAACCCCACCGTGTTCTT<br>CTGCTGTCTTTGGGACCTTGT        |
